# Supplementary material for: Modulating Microbial Materials - Engineering Bacterial Cellulose with Synthetic Biology
Source: PubMed Central journal article supplement (PMC11669176; doi:10.1021/acssynbio.4c00615), 2024-11-07
Supplement: sb4c00615_si_001.pdf [file sb4c00615_si_001.pdf]

## SUPPORTING INFORMATION

### Modulating Microbial Materials - Engineering Bacterial Cellulose with Synthetic Biology

Koray Malci<sup>a,b</sup>, Ivy S. Li<sup>a,b</sup>, Natasha Kissaroudis<sup>b,c</sup>, Tom Ellis<sup>a,b,\*</sup>

<sup>a</sup> Department of Bioengineering, Imperial College London, London SW7 2AZ, UK

<sup>b</sup> Imperial College Centre for Synthetic Biology, Imperial College London, London SW7 2AZ, UK

<sup>c</sup> Department of Life Sciences, Imperial College London, London SW7 2AZ, UK

\* Corresponding author: t.ellis@imperial.ac.uk

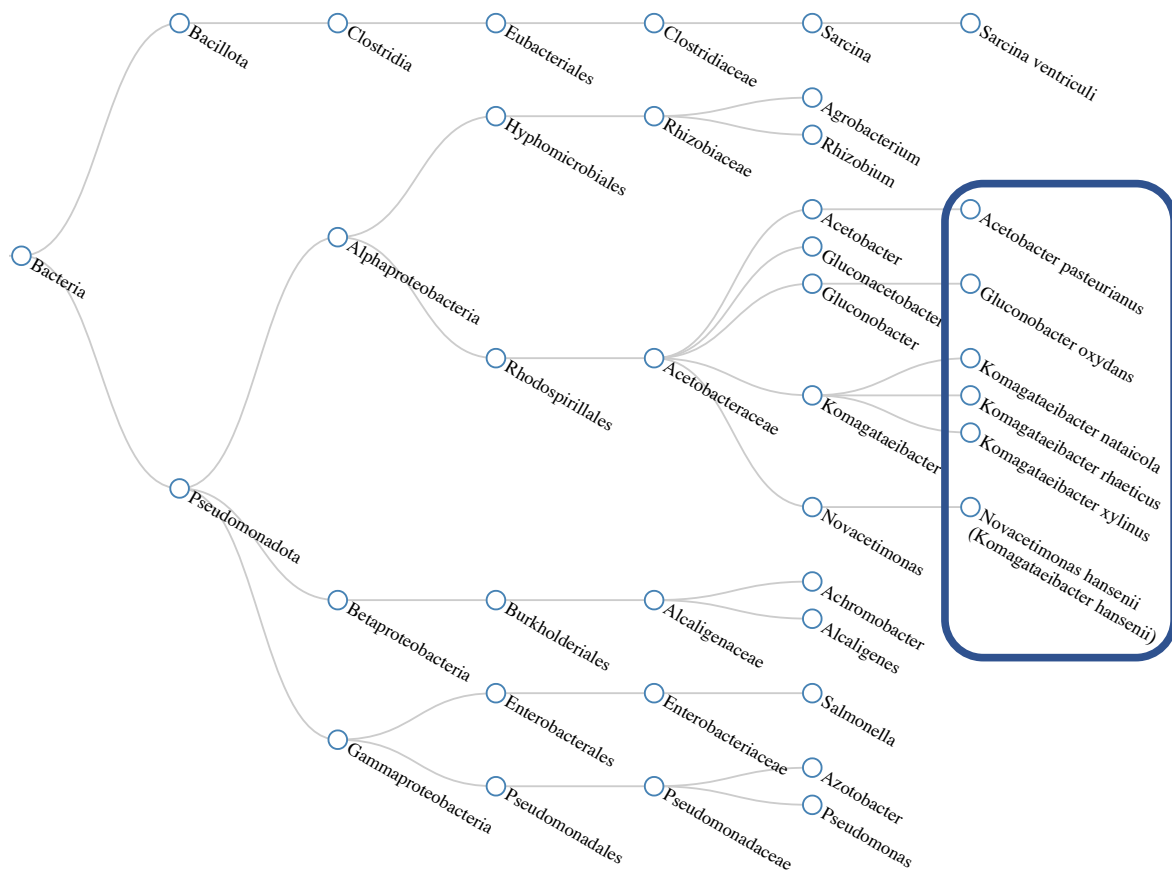

**Figure S1:** Taxonomic relationships of cellulose-producing bacteria. Except for *Sarcina ventriculi*, all BC producers are Gram-negative bacteria. BC-producing species within the *Acetobacteraceae* family, which are the focus of this review, are highlighted in the blue box. The taxonomic tree was constructed using Taxallnomy<sup>1</sup>

#### References

- (1) Sakamoto, T.; Ortega, J. M. Taxallnomy: An Extension of NCBI Taxonomy That Produces a Hierarchically Complete Taxonomic Tree. *BMC Bioinformatics* 2021, 22 (1), 388. <https://doi.org/10.1186/s12859-021-04304-3>.
